# Supplementary material for: Non-Cooperation within a School-Based Wellness Program during the COVID-19 Pandemic—A Qualitative Research
Source: MDPI journal article supplement (doi:10.3390/ijerph19116798), 2022-06-02
Supplement: s1 [file s1]

## Supplementary Material S1

**Table S1.** Topics and description of program sessions

|     |                                        |                                                                                                                                                                                                                                     |
|-----|----------------------------------------|-------------------------------------------------------------------------------------------------------------------------------------------------------------------------------------------------------------------------------------|
| 1.  | Introduction to “Favoring My Self”     | Acquaintances; Discussion of expectations; Introduction of the program and its goals; Establishment of a group contract.                                                                                                            |
| 2.  | Self-care moderation                   | Importance of self-care. Discussing the recommendations and practices of sleeping and eating hygiene. Sharing self-care experiences and outcomes. Understanding the principle of balance and moderation vs. extremes/perfectionism. |
| 3.  | Self-preservation                      | Discussing territorial issues and self-space with of examples from the animal world and participants’ experiences, as well as discussing identification and management of media violence.                                           |
| 4.  | Media literacy                         | Identification of the hidden media messages in relation to media messages; Learn about advertisement strategies used by the media; Development of critical thinking regarding these messages.                                       |
| 5.  | Our feelings                           | Facilitating a “feeling differentiation” activity. Sharing observed and hidden feelings. Suggesting management strategies and practicing emotional conversation.                                                                    |
| 6.  | Accepting appearance differences       | Discussing current societal ideals of appearance, considering their unrealistic and narrow construction. Practicing strategies to avoid and challenge comparisons.                                                                  |
| 7.  | Accepting our weaknesses               | Distinguishing between primary image and authentic self. Examples of people who turned their defects into productive affects. Accepting disadvantages or weaknesses that cannot be changed.                                         |
| 8.  | My body and I                          | Recognition of adolescence as a period of various changes that are often uncontrollable; Role play scenario with strategies of managing and accepting these changes.                                                                |
| 9.  | Adolescent rights and responsibilities | Promoting the desire to grow up due to the extensive opportunities it provides and despite its inherent responsibilities.                                                                                                           |
| 10. | Summary and commitment                 | Reviewing key messages. Committing to engaging in positive self-care and positive body-image behaviors and rejecting risk factors.                                                                                                  |

## **Supplementary Material S2**

Thematic semi-structured interview guide: Non-Cooperation Within a School-Based Wellness Program During the COVID-19 Pandemic - A Qualitative Research

Opening question: Tell me about your experience in "Favoring Myself"

Additional probs were used to ensure that all topics were covered. Each interview was different; however, these were the typical probs:

- What was your general impression of the program?
- Would you please explain this perception in the context of your aims?
- What did you gain personally from the delivery of the program to your children?
- What were you uncomfortable or angry about?
- How did you decide not to participate in the program? What did you explain to your child regarding your choice?
- What barriers did you have to face to collaborate with the program assignments?
- What would you suggest doing differently next year?
- What did you like best in the program?
- Would you suggest that your friends participate in it next year?
